# Supplementary material for: Functional connectivity between the cerebellum and somatosensory areas implements the attenuation of self-generated touch
Source: bioRxiv preprint, doi:10.1101/830646, version 1 (2019-11-04)
Supplement: Table 2-5 [file 830646_file25.docx]

**Extended Table 2-5. Cerebellar activation peaks for the *Movement0cm -by- Touch0cm* interaction.** Peaks﻿ reflecting greater effects of touch when this is presented in the absence of movement (external) compared to when it is presented in the context of movement (self-generated) (Direction: External > Self)

| Brain region | Cluster size (voxels) | MNI coordinates (mm) | | | *z* | *p* |
| --- | --- | --- | --- | --- | --- | --- |
| x | y | z |
| L cerebellum VIIa Crus I | 30 | -44 | -60 | -36 | 3.81 | *p* < 0.001 uncorrected |
| L cerebellum VI | 42 | -24 | -66 | -28 | 3.47 | *p* < 0.001 uncorrected1 |
| L cerebellum VI | 44 | -24 | -66 | -28 | 3.47 | *p* = 0.026 FWE-corrected*1 |
| L cerebellum VI/VIIa Crus I |  | -22 | -64 | -34 | 3.24 | *p* = 0.001 uncorrected |
| L cerebellum VIIb/VIIIa | 10 | -34 | -60 | -54 | 3.24 | *p* = 0.001 uncorrected |

***** Aftersmall volume correction.

1 Different cluster sizes. When applying the anatomical mask for the entire cerebellum, the reported cluster size is 42. When correcting for small volume correction, the cluster size is 44.
